# Supplementary material
Source: publisher figshare collection journal article supplement (https://tandf.figshare.com/articles/dataset/_/19140008)
Supplement: Supplementary file 1 [file 1]

Behavioural and EEG evidence for inter-individual variability in late encoding stages of word  
production: Supplementary material

## ERP analyses

### *General interference*

#### *Results of mass univariate analysis, general interference effect with semantic list*

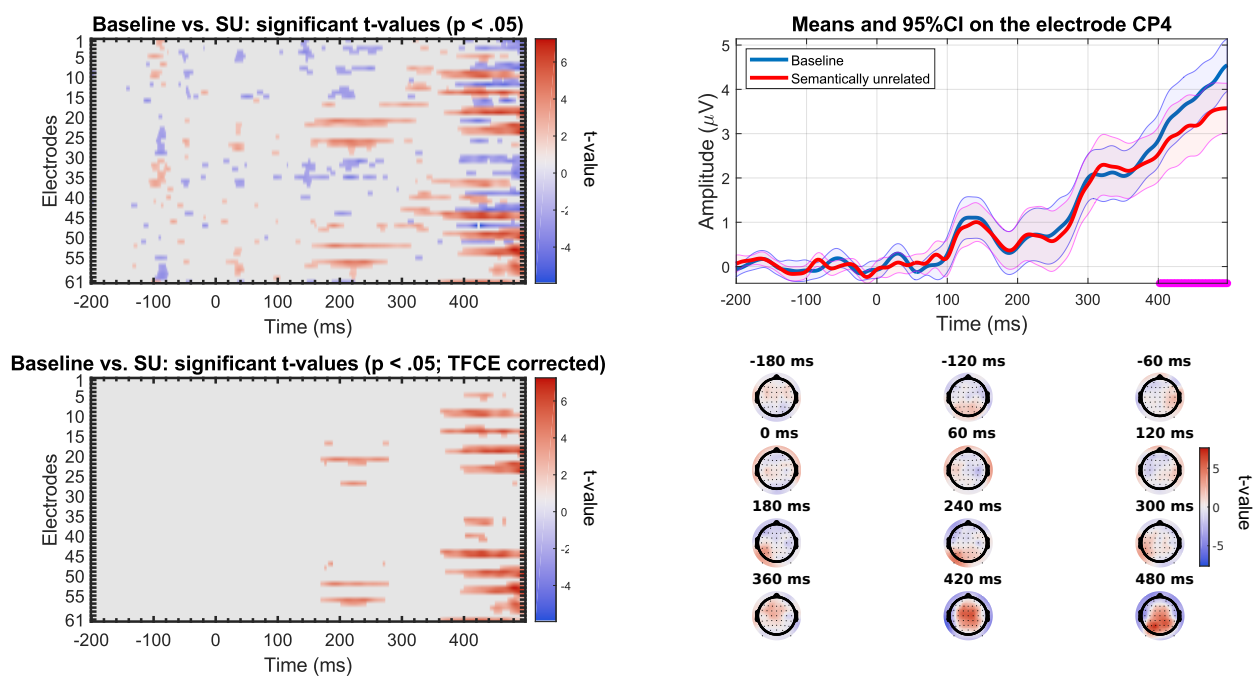

Figure 2: Results of mass univariate analysis for the comparison between the baseline condition and unrelated trials from the semantic list (SU) for the stimulus locked ERPs, with significant  $t$ -values before correction (top left); significant  $t$ -values after correction with TFCE (bottom left); mean amplitude at electrode CP4 (electrode where  $t$ -value is maximal) for the baseline condition and phonological unrelated trials, significant time points (after TFCE correction) underlined in purple (top right); Topographic map of  $t$ -values before correction (bottom right).

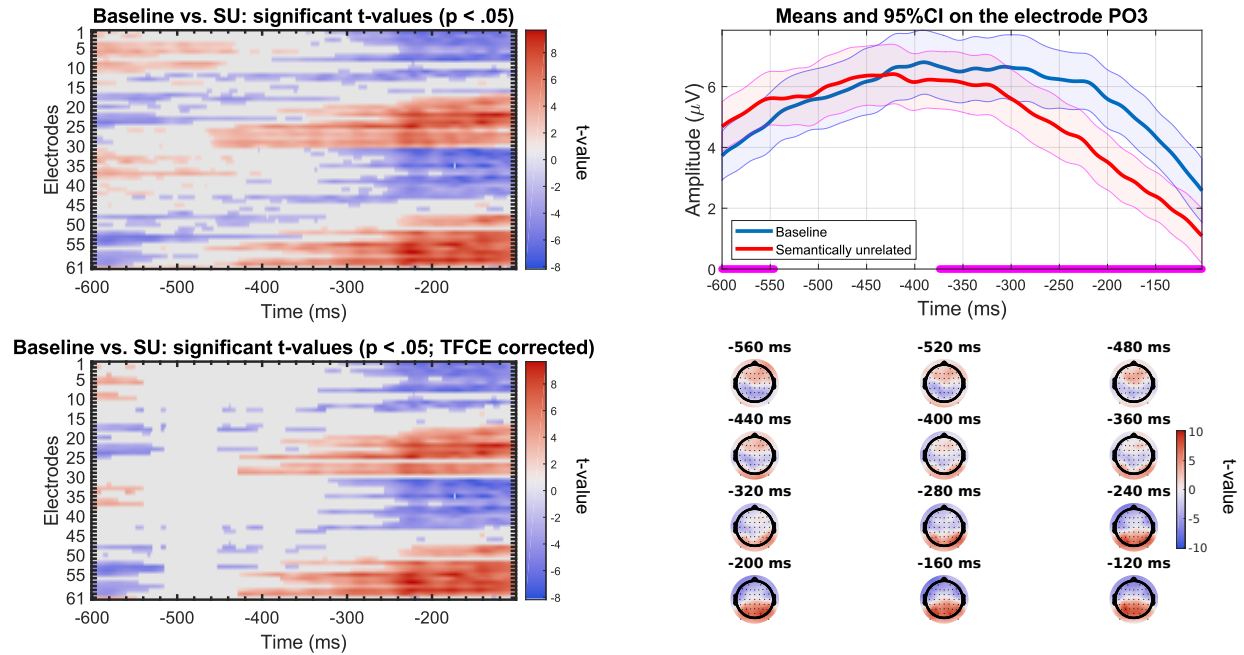

Figure 3. Results of mass univariate analysis for the comparison between the baseline condition and unrelated trials from the semantic list (SU) for the response-locked ERPs, with significant  $t$ -values before correction (top left); significant  $t$ -values after correction with TFCE (bottom left); mean amplitude at electrode PO3 (electrode where  $t$ -value is maximal) for the baseline condition and phonological unrelated trials, significant time points (after TFCE correction) underlined in purple (top right); Topographic map of  $t$ -values before correction (bottom right).

*Results of mass univariate analysis, general interference effect with phonological list*

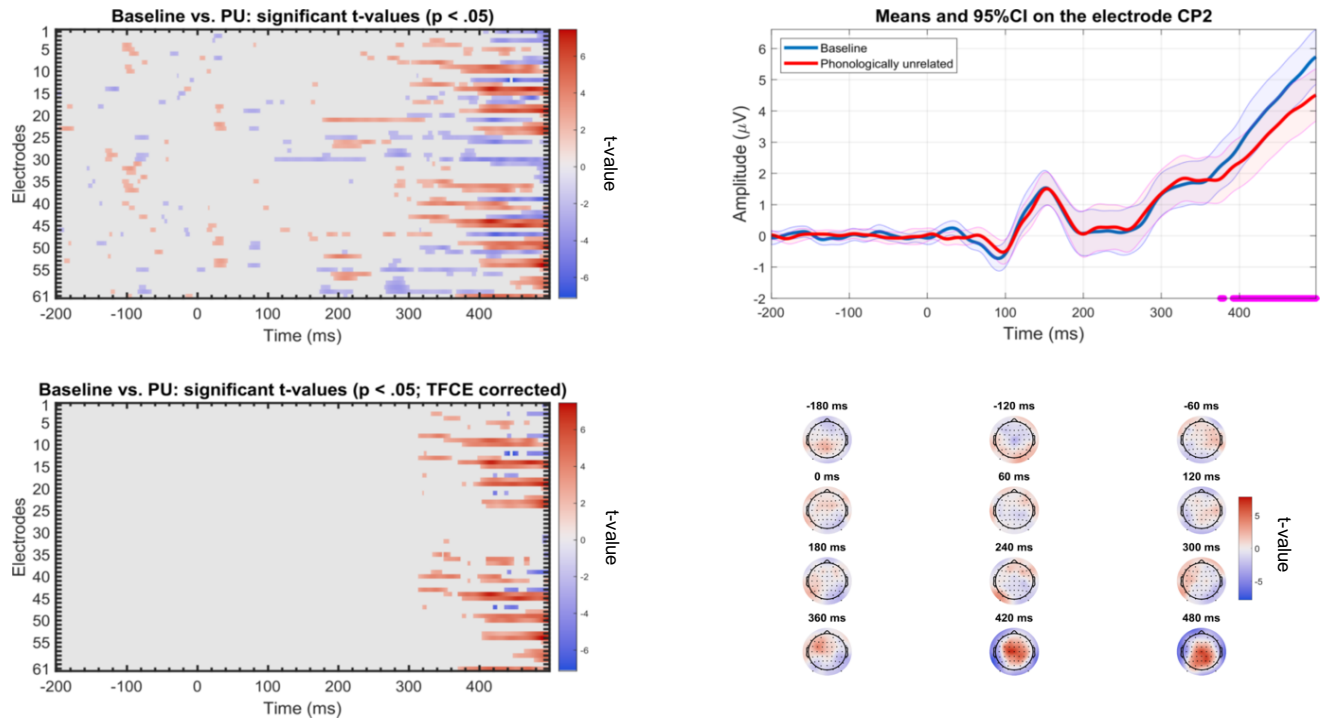

*Figure 4: Results of the mass univariate analysis for the comparison between the baseline condition and phonologically unrelated (PU) trials for the stimulus-locked ERPs, with significant t-values before correction (top left); significant t-values after correction with TFCE (bottom left); mean amplitude at electrode CP2 (electrode where t-value is maximal) for the baseline condition and phonologically unrelated trials, significant time points (after TFCE correction) underlined in purple (top right); Topographic map of t-values before correction (bottom right).*

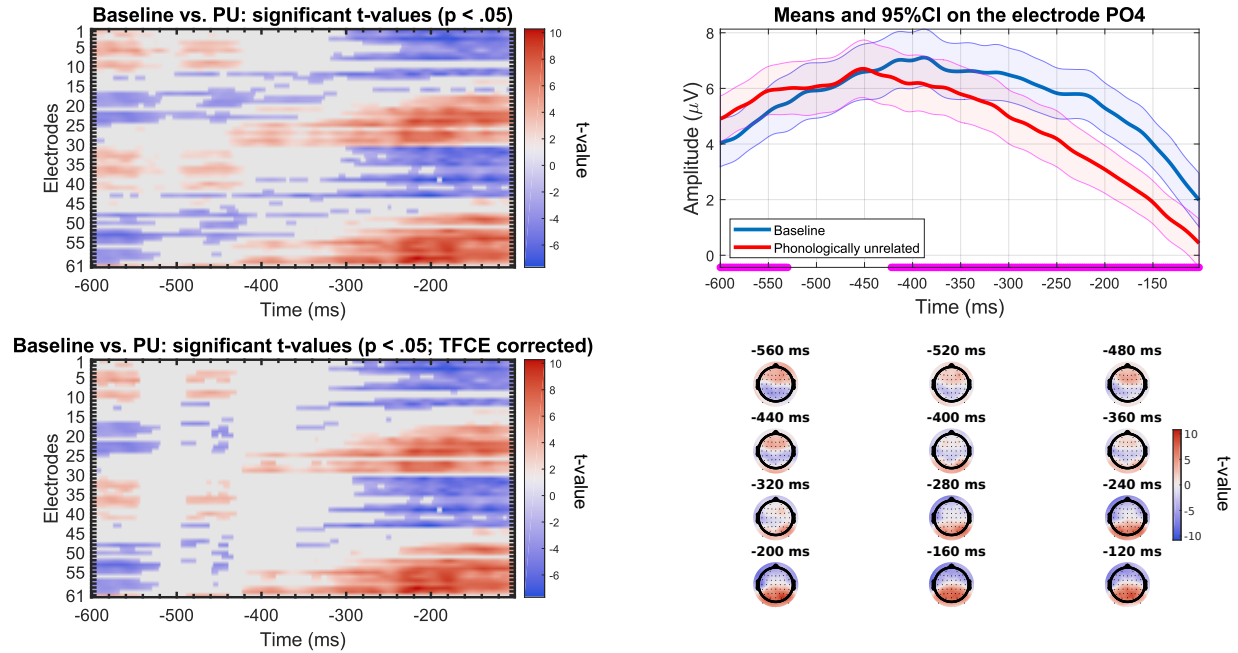

Figure 5. Results of the mass univariate analysis for the comparison between the baseline condition and phonologically unrelated (PU) trials for the response-locked ERPs, with significant  $t$ -values before correction (top left); significant  $t$ -values after correction with TFCE (bottom left); mean amplitude at electrode PO4 (electrode where  $t$ -value is maximal) for the baseline condition and phonological unrelated trials, significant time points (after TFCE correction) underlined in purple (top right); Topographic map of  $t$ -values before correction (bottom right).

*Results of mass univariate analysis, general interference effect with semantic list, grouped by slow and fast participants*

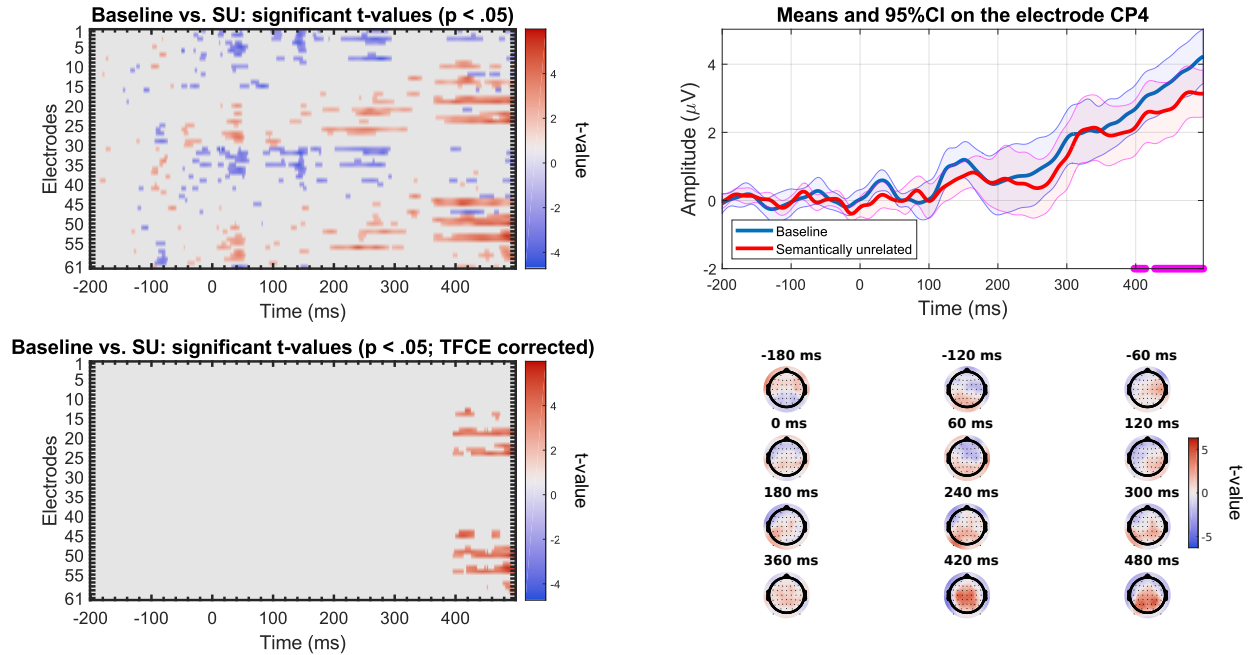

*Figure 6: Results of mass univariate analysis for the comparison between the baseline condition and semantically unrelated (SU) trials for the stimulus-locked ERPs of slow participants, with significant  $t$ -values before correction (top left); significant  $t$ -values after correction with TFCE (bottom left); mean amplitude at electrode CP4 (electrode where  $t$ -value is maximal) for the baseline condition and phonological unrelated trials, significant time points (after TFCE correction) underlined in purple (top right); Topographic map of  $t$ -values before correction (bottom right).*

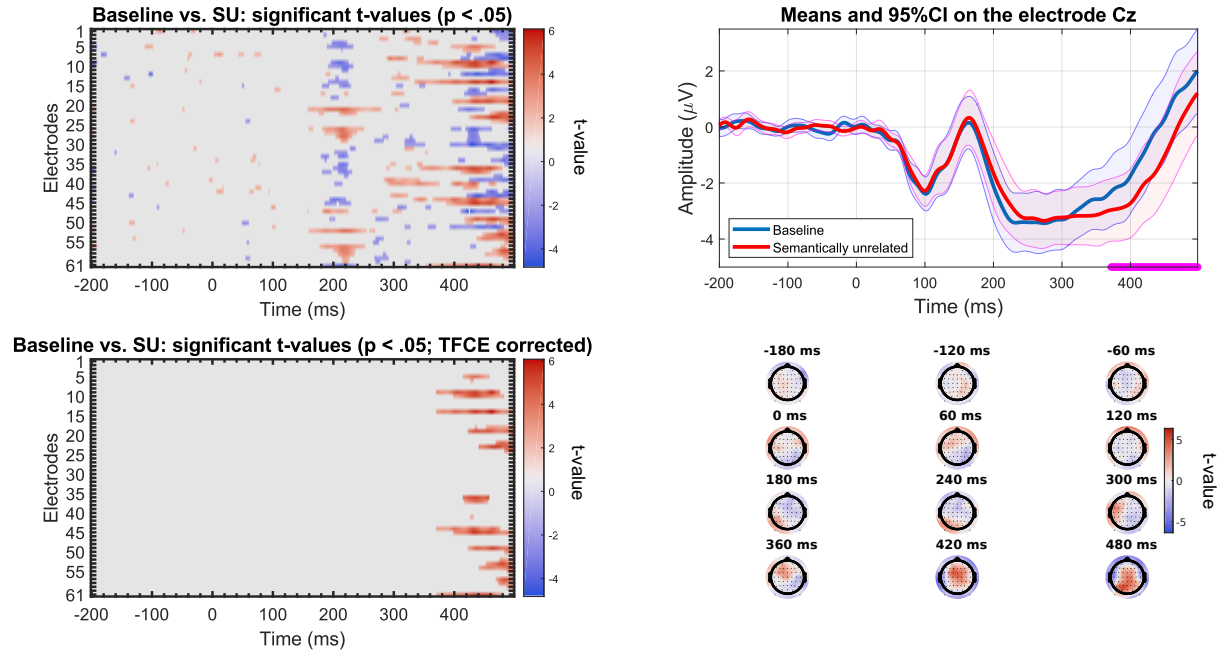

Figure 7: Results of mass univariate analysis for the comparison between the baseline condition and the semantically unrelated (SU) trials for the stimulus locked ERPs of fast participants, with significant t-values before correction (top left); significant t-values after correction with TFCE (bottom left); mean amplitude at electrode Cz (electrode where t-value is maximal) for the baseline condition and phonological unrelated trials, significant time points (after TFCE correction) underlined in purple (top right); Topographic map of t-values before correction (bottom right).

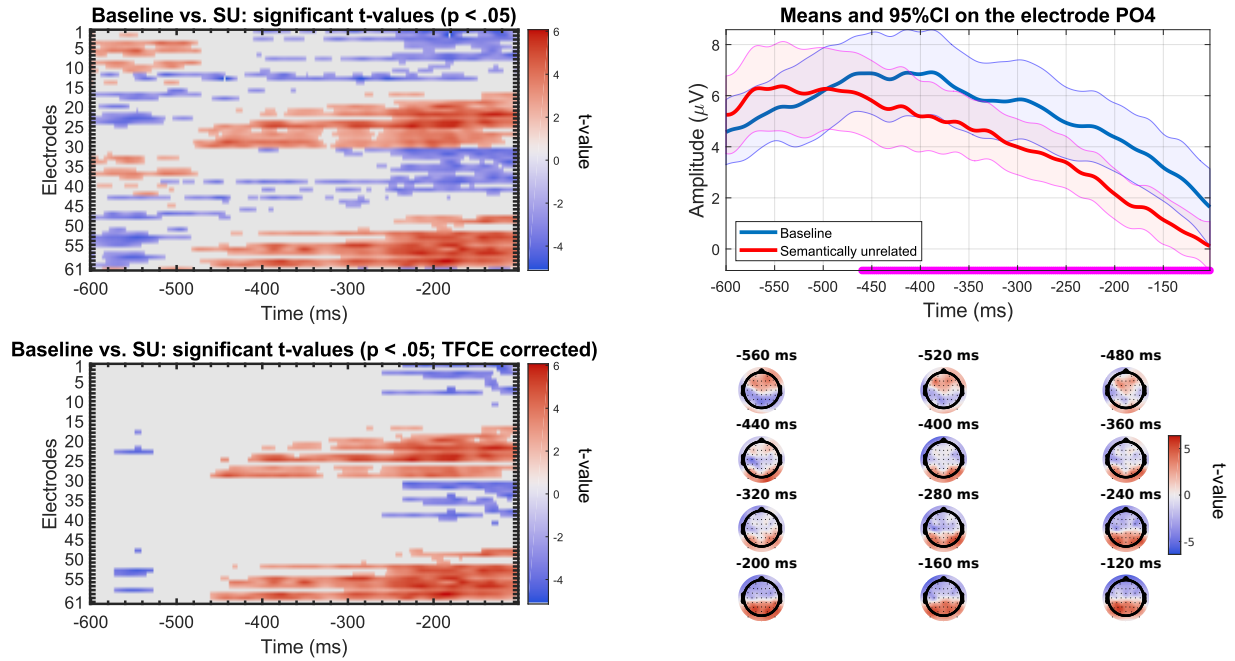

Figure 8: Results of mass univariate analysis for the comparison between the baseline condition and the semantically unrelated (SU) list for the response-locked ERPs of slow participants, with significant t-values before correction (top left); significant t-values after correction with TFCE (bottom left); mean amplitude at electrode PO4 (electrode where t-value is maximal) for the baseline condition and phonological unrelated trials, significant time points (after TFCE correction) underlined in purple (top right); Topographic map of t-values before correction (bottom right).

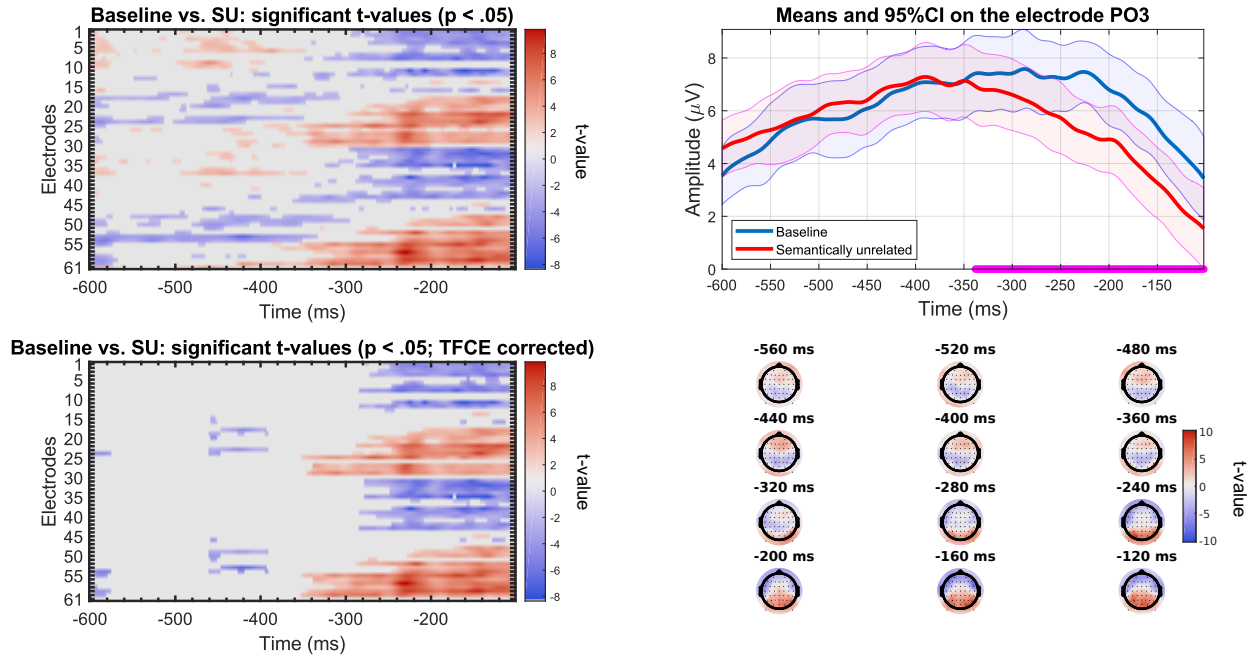

Figure 9: Results of mass univariate analysis for the comparison between the baseline condition and the semantically unrelated list (SU) for the response-locked ERPs of fast participants, with significant  $t$ -values before correction (top left); significant  $t$ -values after correction with TFCE (bottom left); mean amplitude at electrode PO3 (electrode where  $t$ -value is maximal) for the baseline condition and phonological unrelated trials, significant time points (after TFCE correction) underlined in purple (top right); Topographic map of  $t$ -values before correction (bottom right).

*Results of mass univariate analysis, general interference effect with phonological list, grouped by slow and fast participants*

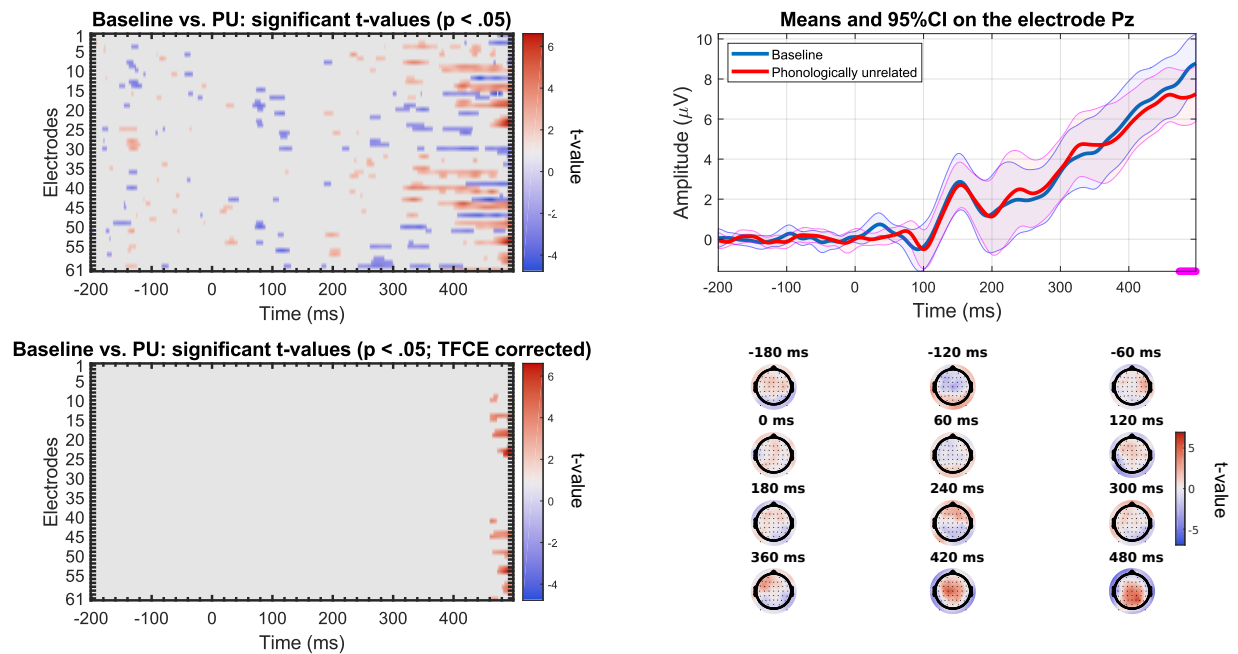

*Figure 10. Results of mass univariate analysis for the comparison between baseline and unrelated trials (phonological list, PU) for the stimulus-locked ERPs in slow participants with significant t-values before correction (top left); significant t-values after correction with TFCE (bottom left); mean amplitude at electrode CP6 (electrode where t-value is maximal) for the baseline condition and phonological unrelated trials, significant time points (after TFCE correction) underlined in purple (top right); Topographic map of t-values before correction (bottom right).*

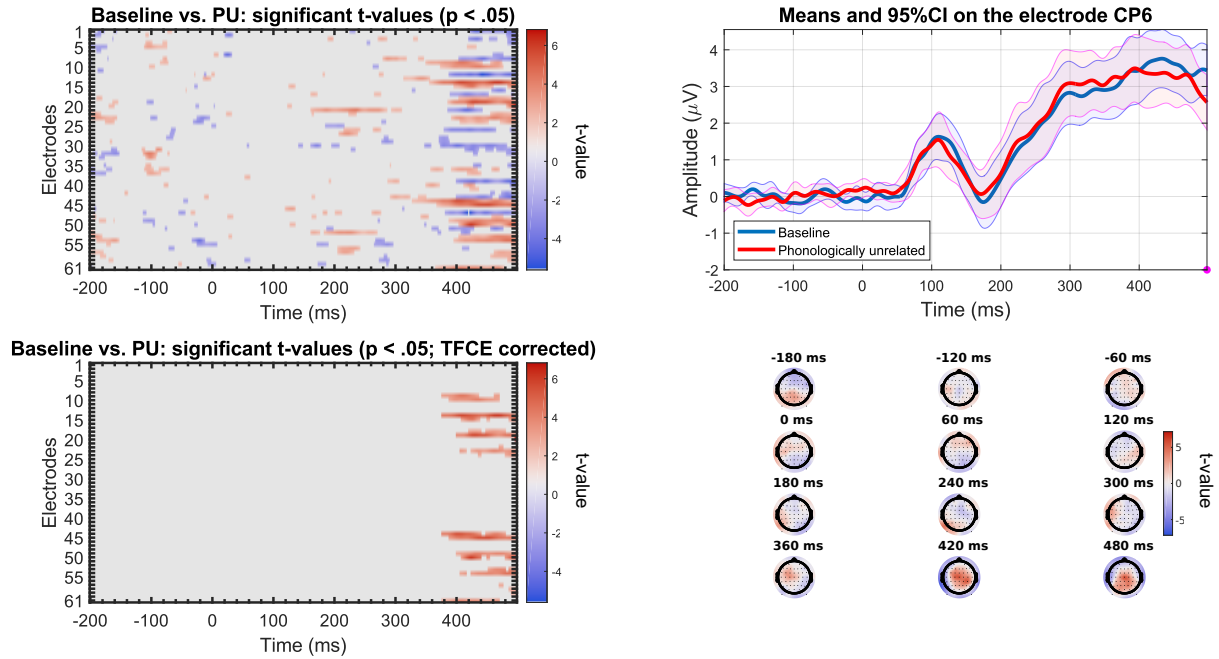

Figure 11. Results of mass univariate analysis for the comparison between baseline and unrelated trials (phonological list, PU) for the stimulus-locked ERPs in fast participants with significant  $t$ -values before correction (top left); significant  $t$ -values after correction with TFCE (bottom left); mean amplitude at electrode CP6 (electrode where  $t$ -value is maximal) for the baseline condition and phonological unrelated trials, significant time points (after TFCE correction) underlined in purple (top right); Topographic map of  $t$ -values before correction (bottom right).

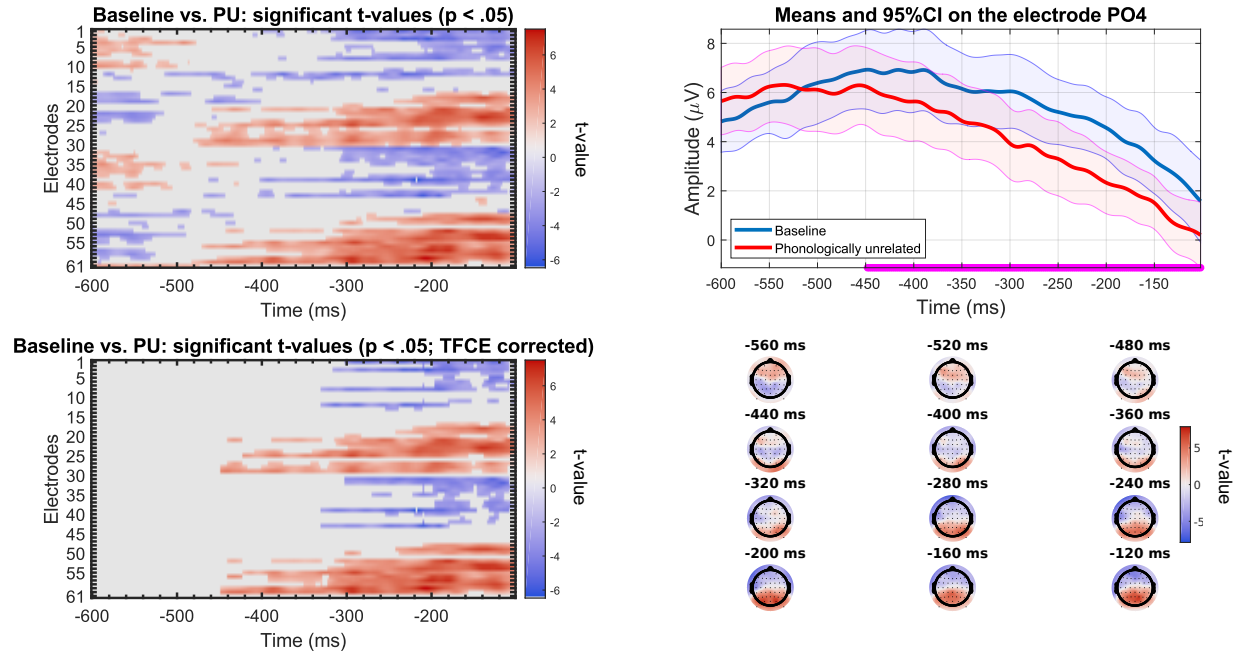

Figure 12. Results of mass univariate analysis for the comparison between baseline and unrelated trials (phonological list, PU) for the response-locked ERPs in slow participants with significant  $t$ -values before correction (top left); significant  $t$ -values after correction with TFCE (bottom left); mean amplitude at electrode PO8 (electrode where  $t$ -value is maximal) for the baseline condition and phonological unrelated trials, significant time points (after TFCE correction) underlined in purple (top right); Topographic map of  $t$ -values before correction (bottom right).

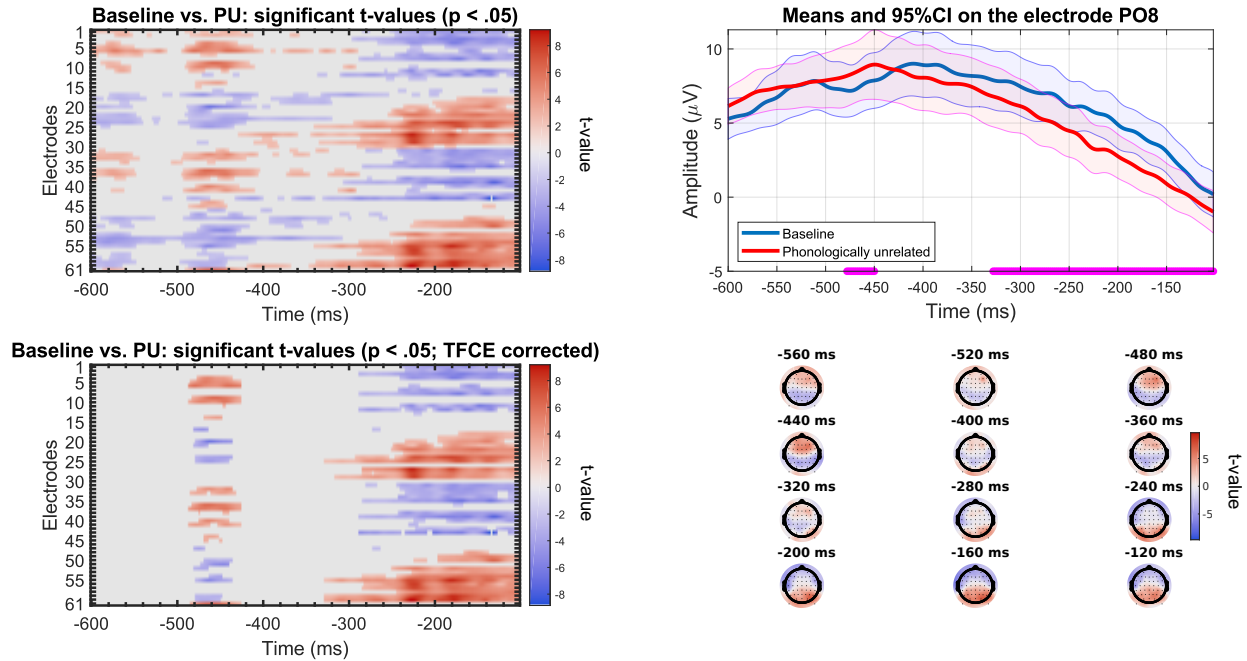

Figure 13. Results of mass univariate analysis for the comparison between baseline and unrelated trials (phonological list, PU) for the response-locked ERPs in fast participants with significant t-values before correction (top left); significant t-values after correction with TFCE (bottom left); mean amplitude at electrode PO8 (electrode where t-value is maximal) for the baseline condition and phonologically unrelated trials, significant time points (after TFCE correction) underlined in purple (top right); Topographic map of t-values before correction (bottom right).
